# Supplementary material
Source: publisher figshare collection journal article supplement (https://tandf.figshare.com/ndownloader/files/13878125)
Supplement: Supplementary file 1 [file 13878125]

**Supplementary Tables**

| **Entry Name** | **Latin Name** | **English Name** | **Peptide Sequence** | **Net Charge** |
| --- | --- | --- | --- | --- |
| **Mammals** | | | | |
| P10646 | *Homo sapiens* | Human/Orangutan/Gorilla/Bonobo/Chimpanzee | GGLIKTKRKRKKQRVKIAYEEIFVKNM | 8 |
| F6X3Z5 | *Equus caballus* | Horse | EGLIKTKRKRKKQPVKIVYEKIFVKKT | 9 |
| Q28874 | *Canis familiaris* | Dog | GGLIKTKRKRKKQTVKIVYEKIFVKKL | 10 |
| XP_005675929.1 | *Capra hircus* | Goat | EGLLKTKRKRKKQLVKIEYKFVTLLRH | 8 |
| XP_006935478 | *Felix catus* | Cat | GGLIKTKRKRKKQTVKIGYEKIFVKKI | 10 |
| P19761 | *Oryctolagus cuniculus* | Rabbit | GGLIKTKRKKKKQPVKITYVETFVKKT | 9 |
| O54819 | *Mus musculus* | Mouse | TGLIKNKSKGVVKIQRRKAPFVKVVYE | 7 |
| **Birds** | | | | |
| G1MZI9 | *Meleagris gallopavo* | Common turkey | RRLIRIKKKKKQSLKTVGEEIIRGRIQ | 9 |
| XP_009333258 | *Pygoscelis adeliae* | Adélie penguin | RRLIKIKKKKKKQSVKALGEEIIPERI | 8 |
| **Reptiles** | | | | |
| U3T7D1 | *Ovophis okinavensis* | Ryukyu Island pit viper | KGVMKIRRKRKKQVVKLVDGAIVIERI | 12 |
| XP_006259765.1 | *Alligator mississippiensis* | American alligator | RGIIKIKRKRKKQPEKMVRDEIIIERI | 8 |
| **Fishes** | | | | |
| XP_006010892.1 | *Latimeria chalumnae* | West Indian Ocean coelacanth | KKGSNRNSPSKLRRRRVRMKKIKVQKE | 12 |
| Q504K2 | *Danio rerio* | Zebrafish | MKDQHRRKQIRIKTRNSNILFRSV | 7 |

**Supplementary Table 1.** List of selected TFPI-1 C-terminal peptides used in this study

| **Entry Name** | **Latin Name** | **English Name** | **ProteinSequence** | **Net Charge** |
| --- | --- | --- | --- | --- |
| **Mammals** | | | | |
| P10646 | *Homo sapiens* | Human | CKKGFIQRISKGGLIKTKRKRKKQRVKIAYEEIFVKNM | 12 |
| Q28864 | *Macaca mulatta* | Rhesus macaque | CKKGFIQRISKGGLIKTKRKRKKQRVKIAYEEVFVKNM | 12 |
| P19761 | *Oryctolagus cuniculus* | Rabbit | CKKGFIPKSIKGGLIKTKRKKKKQPVKITYVETFVKKT | 13 |
| Q28874 | *Canis familiaris* | Dog | CKKGFMQRISKGGLIKTKRKRKKQTVKIVYEKIFVKKL | 14 |
| F6WEH0 | *Ornithorhynchus anatinus* | Duckbill platypus | CKKGFNRKVKGGLIKTKRKRKKLPVKITYEKILIGKI | 14 |
| W5Q4W4 | *Ovis aries* | Sheep | CERGYIRRISKEGLIKTKRKRKKQLVKIEYKFVTLQHHFY | 10 |
| H2P836 | *Pongo abelii* | Sumatran orangutan | CKKGFIQRISKGGLIKTKRKRKKQRVKIAYEEIFVKNM | 12 |
| F6X3Z5 | *Equus caballus* | Horse | CKKGFIQRISKEGLIKTKRKRKKQPVKIVYEKIFVKKT | 13 |
| U6DP88 | *Neovison vison* | American mink | CKKGFIQRISKGGLIKTKRKRKKQRVKIVYEKIFVKKT | 15 |
| G3RM61 | *Gorilla gorilla gorilla* | Western lowland gorilla | CKKGFIQRISKGGLIKTKRKRKKQRVKIAYEEIFVKNM | 12 |
| G1LRQ5 | *Ailuropoda melanoleuca* | Giant panda | CKKGFIQRISKGELIKTKRKRKKTVKIVYEKIFVKKI | 13 |
| Q1LZ77 | *Bos taurus* | Bovine | CKKGFIQRISKEGLIKTKKKKK | 9 |
| XP_011354704.1 | *Pteropus vampyrus* | Large flying fox | CKKGFIQRISKGGLIKTKRKKKKSVKIVYEKVFVKKI | 14 |
| XP_003823562.1 | *Pan paniscus* | Bonobo | CKKGFIQRISKGGLIKTKRKRKKQRVKIAYEEIFVKNM | 12 |
| XP_008824957.1 | *Nannospalax galili* | Spalax | CKRGFIYRKSKEGLIKTKRKRKKPSVKIVYEKIIKKI | 14 |
| XP_008571211.1 | *Galeopterus variegatus* | Sunda flying lemur | CKKGFIQRLSKGGLIKTKRKRKKQTLKKVYEEIVKNT | 12 |
| XP_006935478 | *Felix catus* | Cat | GFIQRTSKGGLIKTKRKRKKQTVKIGYEKIFVKKI | 12 |
| XP_008685462.1 | *Ursus maritimus* | Polar bear | CKKGFIQRISKGGLIKTKRKRKKTVKIVYEKIFVKKI | 14 |
| XP_010958321 | *Camelus bactrianus* | Bactrian camel | CKKGFIQRISKEGLIKTKRKRKKQPVKIVYEEIFVKKI | 11 |
| XP_010858027 | *Bison Bison Bison* | American bison | CKKGFIQRISKEGLIKTKRKRKMQRVKLEYKFVTLQHYF | 11 |
| XP_003406008 | *Loxodonta Africana* | African Bush Elephant | CKKGFIRRISKEFIKTKRKRKQQVKMPHEEIFGEKI | 9 |
| XP_010635120 | *Fukosmys damarensis* | Damaraland more-rat | CKKGFIRRKSKEGLIKTKKKRKRPRVKVGYDYYVRKI | 15 |
| XP_010349891 | *Simiri boliviensis boliviensis* | Bolivian squirrel monkey | CKKGFFQRKSKEGLIKTKRKRKKLKVKIGYEEIFLKNT | 12 |
| XP_009442120.1 | *Pan troglodytes* | Chimpanzee | CKKGFIQRISKGGLIKTKRKRKKQRVKIAYEEIFVKNM | 12 |
| XP_007957164.1 | *Orycteropus afer afer* | Aardvark | CKKGFLKRISKGGLMKTRRKRKQPVKIVYDEISVKNI | 11 |
| XP_007529615.1 | *Erinaceus europaeus* | Western European hedgehog | CDKGFFERISKEGLIKTKRKRKKQTVTILYEKN | 7 |
| XP_007110242.1 | *Physeter catodon* | Sperm whale | CKKGFIQRLSKGGLIKTKRKRKKQPVKIVYEEIFVKNI | 11 |
| XP_006921335.1 | *Pteropus alecto* | Black flying fox | CKKGFIQRISKGGLIKTKRKKKKSVKIVYEKVFVKKI | 14 |
| XP_006864130.1 | *Chrysochloris asiatica* | Cape golden mole | CKKGFIQRISKGGLIKTKRKKKKQTVKIVYEEIFVKNI | 11 |
| XP_006879005.1 | *Elephantulus edwardii* | Cape elephant shrew | CKKGFIQKINKGLIKTKINEGLIKTRRKSKQPKVKIVFEDISVKKT | 12 |
| XP_006147909.1 | *Tupaia chinensis* | Chinese tree shrew | CKRGFIKRISKGGLIKTKRKRKKQPVKIVYEEIFVMI | 11 |
| XP_005980067.1 | *Pantholops hodgsonii* | Tibetan antelope | CERGYIRRISKEGLLKTKRKRKKQLVKIVYKFVTLQHHFY | 11 |
| XP_005889606.1 | *Bos mutus* | Wild Yak | CKKGFIQRISKEGLIKTKRKRKMQRVKLEYKFVTLQHYF | 11 |
| XP_005675929.1 | *Capra hircus* | Goat | CERGYIRRISREGLLKTKRKRKKQLVKIEYKFVTLLRHFH | 11 |
| XP_005373386.1 | *Chinchilla lanigera* | Long-tailed chinchilla | CQKGFIKRKSKEGLIKTRRRRRKQRVKIVFKPVVKKI | 16 |
| XP_005324449.1 | *Ictidomys tridecemlineatus* | Thirteen-lined ground squirrel | CKKGFIQRISKEGLIKTKRKRKKQPVKILFEEVFVKNI | 10 |
| XP_005346715.1 | *Microtus ochrogaster* | Prairie vole | CKKGFIKRVTKGGKINTQKGKEPTVKVV | 8 |
| XP_003801089.1 | *Otolemur garnettii* | Small-eared galago | CKKGFIQRISKGELIKTKRKRKKQPIKITYEEIFVKKI | 11 |
| XP_004276968.1 | *Orcinus orca* | Killer whale | CKKGFIQRISKGGLIKTKRKRKKQPVKIVYEEIFVKKI | 12 |
| XP_004312276.1 | *Tursiops truncatus* | Bottlenosed dolphin | CKKGFIQRISKGGLIKTKRKRKKQPVKIAYEEIFVKKI | 12 |
| XP_004385665.1 | *Trichechus manatus latirostris* | Florida manatee | CKKGFIQRKSKGGAIKIKRKRKKPQVKTVYKEMFVKKI | 15 |
| XP_004392443.1 | *Odobenus rosmarus divergens* | Pacific walrus | CKKGFIQRISKGGLIKTKRKRKKQTVKIVYEKIFVKKI | 14 |
| XP_004426773.1 | *Ceratotherium simum simum* | Southern white rhinoceros | CKKGFIQRISKEGLIKTKRKRKKPPVKIVYEKIVVKKI | 13 |
| XP_004577044.1 | *Ochotona princeps* | American pika | CKKGFIRRLSKGGLIKTKRKRKKQSKKIVHEEVFINKT | 13 |
| XP_004601443.1 | *Sorex araneus* | European shrew | CKKGFLWKKRKGILIKTKRKKNLPVQVAYEENKD | 9 |
| XP_004628741.1 | *Octodon degus* | Degu | CKKGFIKRKSKEGLIKTRKKRRKQRVETVNDYLVKKI | 13 |
| O54819 | *Mus musculus* | Mouse | CLRSCKTGLIKNKSKGVVKIQRRKAPFVKVVYESIN | 9 |
| Q02445 | *Rattus norvegicus* | Rat | CKKDSSKKSSKRAKTQRRRKSFVKVMYENIH | 10 |
| **Birds** | | | | |
| ENSGALT00000034022 |  | CHICKEN | CRKGFIKKKDGRRLIRIKKKKKQLLKTKTVGEETIHGRIQF |  |
| G1MZI9 | *Meleagris gallopavo* | Common turkey | CRKGFLKKKDGRRLIRIKKKKKQSLKTVGEEIIRGRIQ | 13 |
| XP_010711641.1 | *Meleagris gallopavo* | Wild turkey | CRKGFLKKKDGRRLIRIKKKKKQSLKTVGEEIIRGRIQL | 13 |
| XP_010581525.1 | *Haliaeetus leucocephalus* | Bald eagle | CKKGFNKKKGERRLIKINKKRKKQSVKALGEEIIPERIQL | 11 |
| XP_010308619.1 | *Balearica regulorum gibbericeps* | Grey crowned crane | CNKGFNKKKGERRLIKIKKKRKKQSVKALGKEIIPERIQL | 13 |
| XP_010186799.1 | *Mesitornis unicolor* | Brown mesite | CKKGFNKRKGERRLIKIKKKETVSKGSGQGNNS | 10 |
| XP_010145265.1 | *Eurypyga helias* | Sunbittern | CKKGFGKKKGDRGLIRIKKKRKKQSVKALGVEVIPERMQL | 12 |
| XP_009972166.1 | *Tyto alba* | Barn owl | CKKGFNKKKGERRLIKIKKKRKKQSVKALGKEIIPERIQ | 14 |
| XP_009993531.1 | *Chaetura pelagica* | Chimney swift | CKKGFNKRKGERRLIKIKKKKKKPVSQGSGRGNNS | 14 |
| XP_009983251.1 | *Tauraco erythrolophus* | Red-crested turaco | CKKGFNKKKGERRLIKIKKKRRKQSVKALGEEIIPERIQL | 12 |
| XP_009956892.1 | *Leptosomus discolor* | Cuckoo roller | CKKGFSKKRSERRLIQIKKKRKKQSVKALGEEIITERIQL | 11 |
| XP_009931724.1 | *Opisthocomus hoazin* | Hoatzin | CKKGFSKKKGQRRVIKIKKKRKKQSVKALGEEIIPERTQL | 13 |
| XP_009888427.1 | *Charadrius vociferus* | Killdeer | CKKGFNKKKGERRLIKIKKKRKKQSVKAPGEEIMSEKIQL | 12 |
| XP_009909519.1 | *Picoides pubescens* | Downy woodpecker | CKKGFNKKKGERRLIKLKKRRKKQSVKDWEITPGRTQL | 13 |
| XP_009699393.1 | *Cariama cristata* | Red-legged seriema | CKKGFNKKKGERRLIKIKKKRKKQSVKALGEEIIPERIQL | 12 |
| XP_009812804.1 | *Gavia stellata* | Red-throated loon | CKKGFNKKKGERRLIKIKKKRKKQSVKALGEEIIPERI | 12 |
| XP_009641903.1 | *Egretta garzetta* | Little egret | CKKGFNKNKGERRLIKIKKKRKKQSVKARGKDIIPERIQL | 14 |
| XP_009086397.1 | *Serinus canaria* | Atlantic canary | CKKGFNKKKGERRLRRIKKKRKKQPVKALGMEIIPEAMQL | 13 |
| XP_009075128.1 | *Acanthisitta chloris* | Rifleman | CLRICKKGFNKKKDERRLIKMKRKRKKQSAKALGEEIIPERIQL | 12 |
| XP_008917595.1 | *Manacus vitellinus* | Golden-collared manakin | CRKGFNKKRGGRKLIKIKKKRKKESVKGSGRGNHP | 15 |
| XP_008628486.1 | *Corvus brachyrhynchos* | American crow | CKKGLNKKKGERRLIKIKKKRKKQPVKALGEEIIPGRMQL | 13 |
| XP_008495162.1 | *Calypte anna* | Anna's hummingbird | CKKGFYKRKGERRLIKIKKKRKKQAVKDLDKEMIPE | 11 |
| XP_005530383.1 | *Pseudopodoces humilis* | Ground tit | CKKGFNKKKGERKLIKIKKKRKKQPVKALGMEIVPERMQL | 13 |
| XP_005430061.1 | *Geospiza fortis* | Medium ground finch | CKKGFNKKKGERRLIRIKKKRKKQPVKALGMEIIPEAMQL | 12 |
| XP_005487030.1 | *Zonotrichia albicollis* | White-throated sparrow | CRKGFNKKIGERRLIRIKKKRKKQPVKALDLEIMPEAMQL | 10 |
| XP_005434596.1 | *Falco cherrug* | Saker falcon | CKKGFNKTKGERRLIKIKKKRKKQSVKALGKEIIPEGIQL | 12 |
| XP_005237104.1 | *Falco peregrinus* | Peregrine falcon | CKKGFNKTKGERRLIKIKKKRKKQSIKALGKEIIPEGIQL | 12 |
| XP_005049380.1 | *Ficedula albicollis* | Collared flycatcher | CKKGFNKKKGERRLIKIKKKRKKQPVKALGMEIVPERMQL | 13 |
| XP_011589207 | *Aquila chrysaetos canadensis* | Golden Eagle | CKKGFNKKKGERRLIKINKKRKKQSVKALGEEIIPERIQL | 11 |
| XP_009333258 | *Pygoscelis adeliae* | Adélie penguin | CKKGFNKKKGERRLIKIKKKKKKQSVKALGEEIIPERIQL | 12 |
| XP_010404792.1 | *Corvus cornix cornix* | Hooded crow | CKKGLNKKKGERRLIKIKKKRKKQPVKALGEEIIPERMQL | 12 |
| XP_009466285.1 | *Nipponia nippon* | Crested ibis | CKKGFNKKKGERRVIRIKKKRKKQPVKVLGEEIIPERKQL | 13 |
| XP_008941110.1 | *Merops nubicus* | Northern carmine bee-eater | CKKGFNKKKGERRLIKIKKKKKKQSVKALGEEIIPERIQL | 12 |
| XP_005504302.1 | *Columba livia* | Rock pigeon | CKKGFNKKKGERRLIKIKKKRKKQPVKALGDEIMPERIQL | 12 |
| **Reptiles** | | | | |
| XP_008115787.1 | *Anolis carolinensis* | Caroline anole | CKKGFIQKHGQKGVMKIRRKRKKRVKLIAGEIVIERI | 12 |
| XP_007423472.1 | *Python bivittatus* | Burmese python | CKKGFIPKKGQKGVMRIRRKRKKQVVKLVDGEIVIERI | 11 |
| V8P216 | *Ophiophagus hannah* | King cobra | CFISKKGQKGVMKMRRKRKKELVKLMDGEIVIERI | 8 |
| U3T7D1 | *Ovophis okinavensis* | Ryukyu Island pit viper | CKKGFISKKGQKGVMKIRRKRKKQVVKLVDGAIVIERI | 12 |
| U3TBN9 | *Protobothrops flavoviridis* | Habu | CKKGFISKKGQKGVMKIRRKRKKQVVKLVDGAIVIERI | 12 |
| H9G4K9 | *Anolis carolinensis* | Green anole (American cameleon) | CKKGFIQKHGQKGVMKIRRKRKKRVKLIAGEIVIERI | 12 |
| XP_007069964.1 | *Chelonia mydas* | Green turtle | CKKGFSKKQGRRSLMKNKRKRKKQLLKLTEDEIIIERI | 11 |
| K7FND1 | *Pelodiscus sinensis* | Chinese softshell turtle | CKKDFNKKQGQRGLIKIKRRRTKQPVKLVEDEIIIERI | 8 |
| XP_005306628.1 | *Chrysemys picta bellii* | Painted turlte | CKKDFSKKQGRRGLLKIKRKRKKQPVKLTEDEIIIERI | 10 |
| XP_006259765.1 | *Alligator mississippiensis* | American alligator | CVTGFNKKQGKRGIIKIKRKRKKQPEKMVRDEIIIERI | 10 |
| XP_006024689.1 | *Alligator sinensis* | Chinese alligator | CVTGFNKKQGKRGIIKIKRKRKKQPEKVVRDEIIIERI | 10 |
| XP_006024690.1 | *Alligator sinensis* | Chinese alligator | CVTGFNKKQGKRGIIKIKRKRKKQPEKVVRDEIIIERI | 10 |
| U3TBN9 | *Protobothrops flavoviridis* | Habu (pit viper) | CKKGFISKKGQKGVMKIRRKRKKQVVKLVDGAIVIERI | 12 |
| **Fishes** | | | | |
| Q504K2 | *Danio rerio* | Zebrafish | CMKDQHRRKQIRIKTRNSNILFRSV | 7 |
| XP_010888225 | *Esox lucius* | Northern Pike | CMKPGYTDKRNTIRIKKKNLNILFRSV | 7 |
| XP_006010892.1 | *Latimeria chalumnae* | West Indian Ocean coelacanth | CKKGSNRNSPSKLRRRRVRMKKIKVQKERRFEPVPIEMT | 12 |
| W5MG52 | *Lepisosteus oculatus* | Spotted gar | CMKGVPITGRIRIKKKNIKILEFHKHL | 7 |

**Supplementary Table 2**. Predicted vertebrate TFPI-1 C-terminal peptides with calculated net positive charge.

**Supplementary Figures**

**
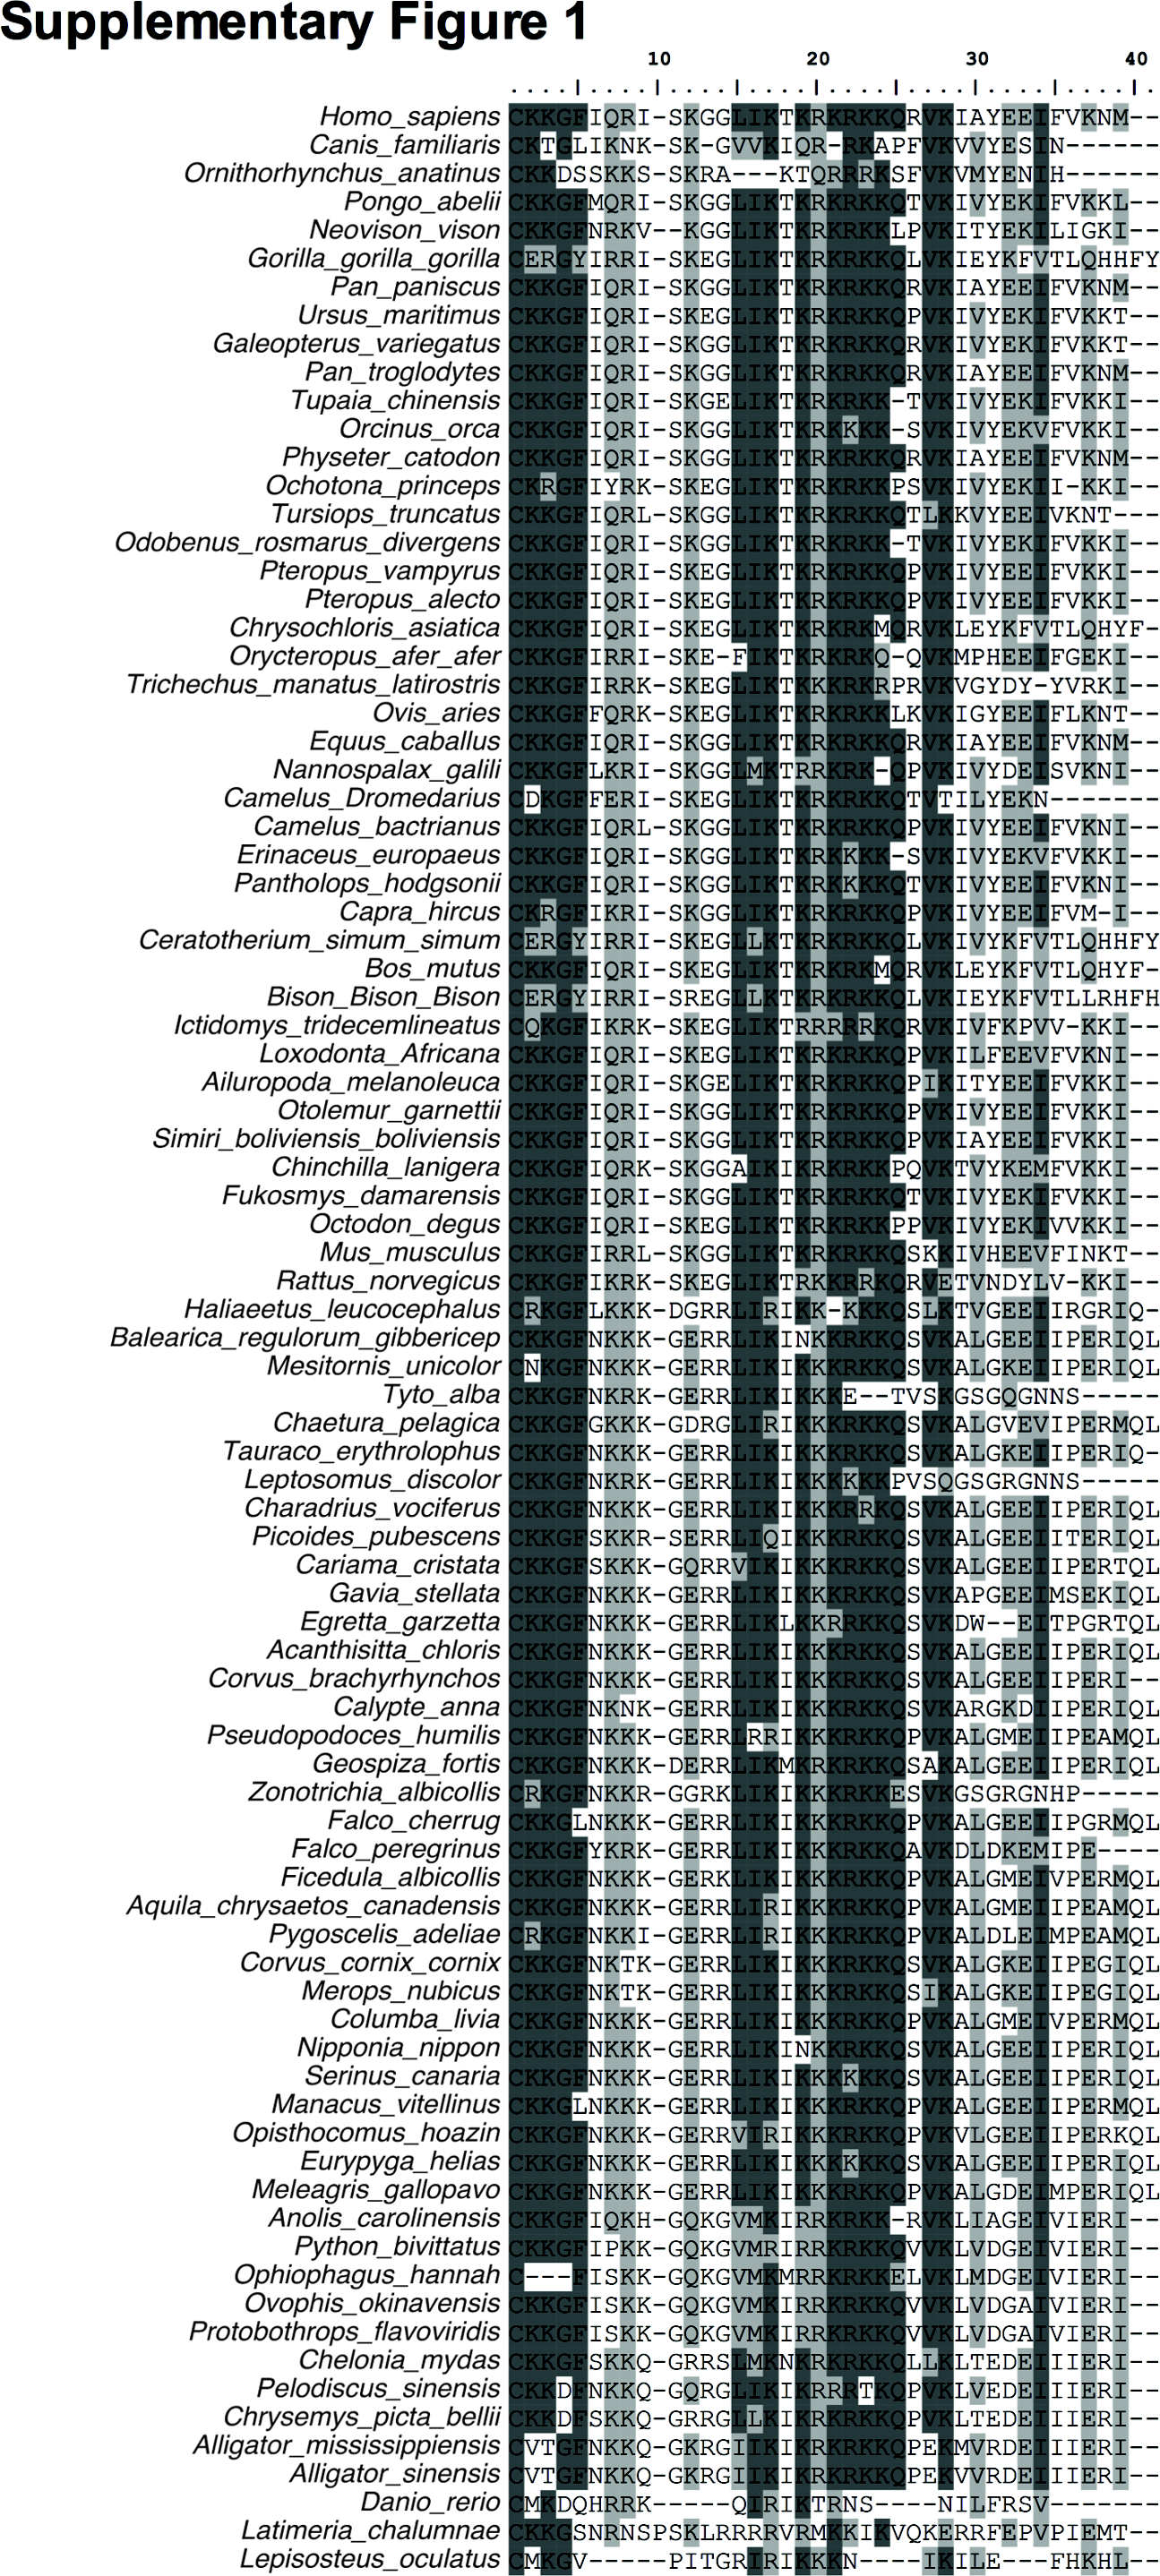
**

**Supplementary Figure 1.** Multiple sequence alignment of the C-terminal TFPI-1 region in different vertebrate species.

**Supplementary Figure 2.** Nucleotide and amino acid sequence comparison of the C-terminal TFPI-1 region in vertebrates. Cleavage sites for plasmin and thrombin in the human TFPI-1 C-terminal region are indicated with arrows.

**Supplementary Figure 3. Antimicrobial activities of TFPI-1 C-terminal peptides. (a)** For determination of antimicrobial activities, *E. coli* ATCC 25922 and *P. aeruginosa* ATCC 27853 (4 x 106 cfu) were inoculated in 0.1% TSB agarose gel. Each 4 mm-diameter well was loaded with 6 μl of peptide (100 µM). The zones of clearance (in mm) correspond to the inhibitory effect of each peptide after incubation at 37 °C for 18-24 h (mean values are presented, n=3). A control with buffer only yielded no inhibition zone. Data are presented as zones of bacterial inhibition (mm); values are mean ± SD (n = 3). **(b)** The complement mediated bactericidal activity of TFPI-1 peptides was assessed in presence of human plasma using viable count analysis. *E. coli* ATCC 25922 bacteria were grown to mid-logarithmic phase and incubated with varying concentrations of different vertebrate peptides in buffers containing 10 mM Tris, pH 7.4 alone, or in presence of 20% human plasma. The antimicrobial activity was determined by plating serial dilutions of bacteria on TH agar plates and the number of cfu was counted after overnight incubation. All tested vertebrate TFPI-1 derived peptides enhanced bacterial killing in presence of human plasma as compared to buffer. **(c)** 4 µg GGL27 were incubated with 20% citrated plasma or 20 µg of purified IgY. GGL27 binding was determined by using rabbit anti-human TFPI-1 C-terminal monoclonal primary antibody and followed by secondary goat anti-rabbit polyclonal antibody.

**
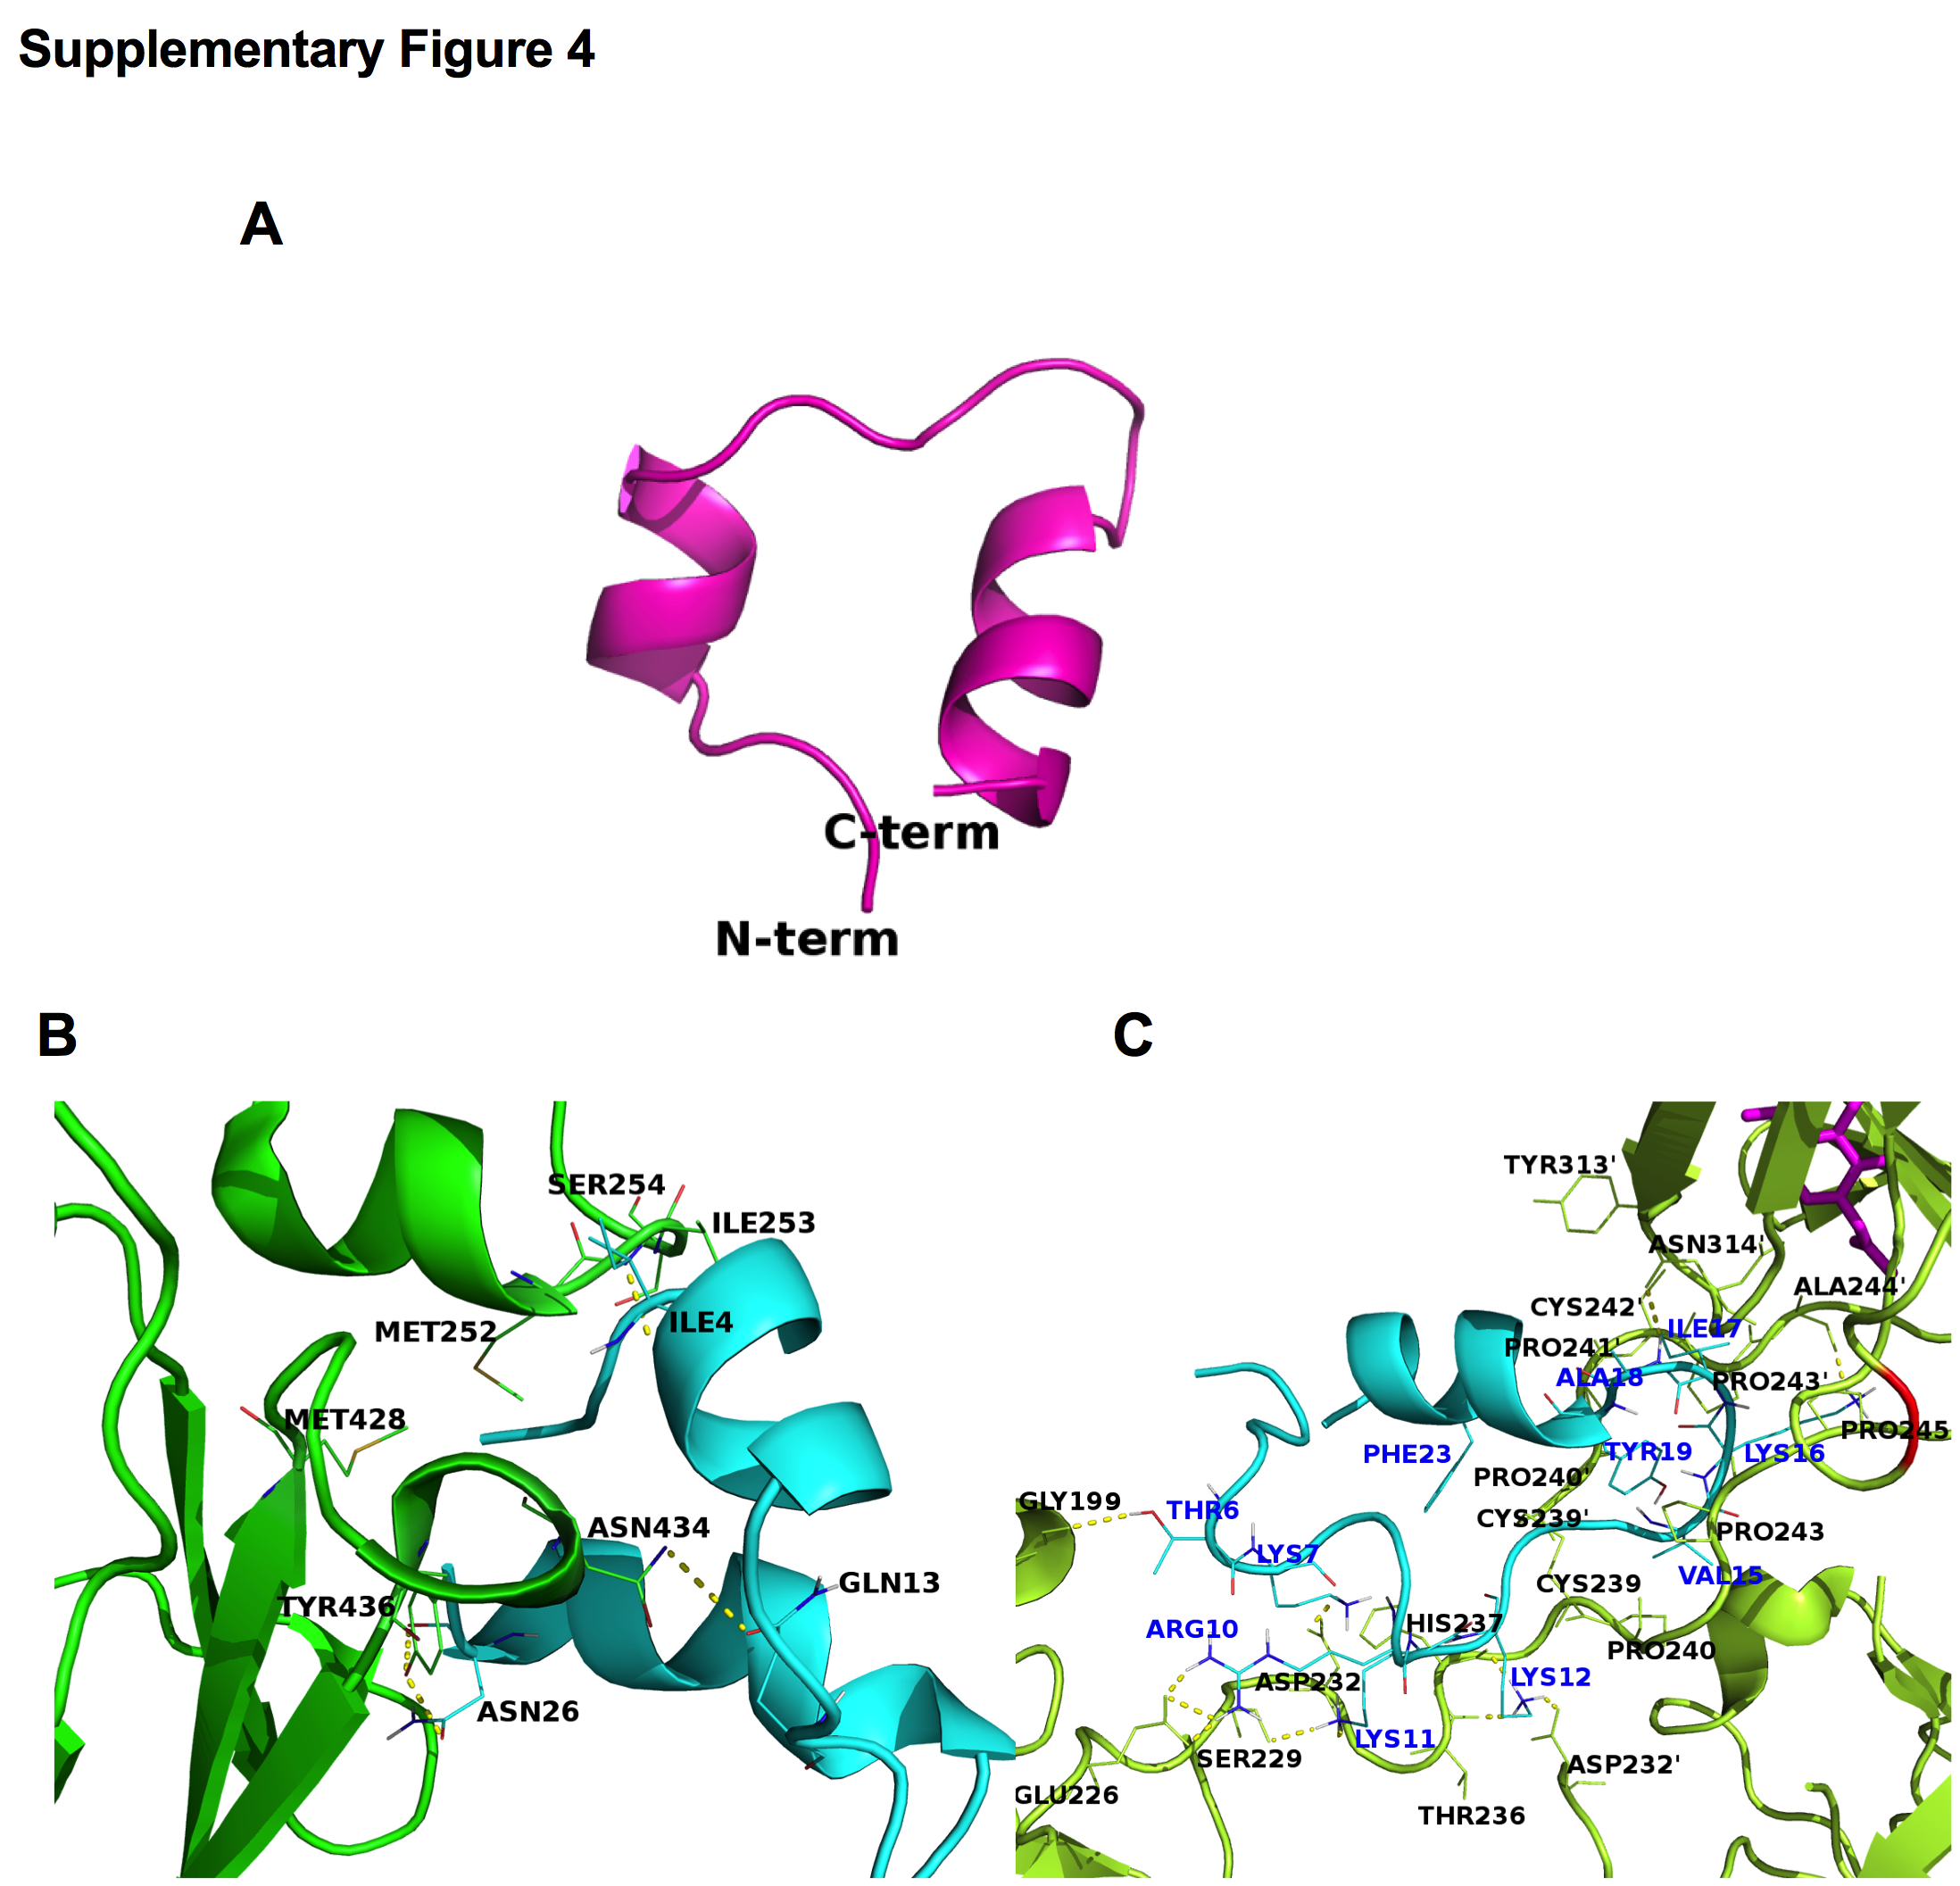
**

**Supplementary Figure 4. Molecular modeling. (a)** 3D structure of the human TFPI C-terminal peptide GGL27. The PEPFOLD 3 predicted peptide structure after a 20-ns molecular dynamics simulation. **(b-c)** Binding interactions of the GGL27 peptide (cyan cartoon) with the ClusPro 2.0 predicted binding sites at IgG1 (green/limon cartoon); zoom-in to Figures 3 F and G. Key interacting residues are shown in lines and hydrogen bonds are shown in yellow dashed lines. (**b)** CH2-CH3 hinge region; **(c)** Fc-Fab linker region.
